# Supplementary material for: A Novel and Practical Chromatographic “Fingerprint-ROC-SVM” Strategy Applied to Quality Analysis of Traditional Chinese Medicine Injections: Using KuDieZi Injection as a Case Study
Source: MDPI journal article supplement (doi:10.3390/molecules22071237), 2017-07-23
Supplement: s1 [file s1]

**Table S1****Table S1****The similarity between different groups of KDZ injection samples with the reference fingerprint**

| <b>Batches NO.</b> | <b>QPs</b> | <b>UPs</b> | <b>HTPs</b> | <b>HIPs</b> |
|--------------------|------------|------------|-------------|-------------|
| <b>1</b>           | 0.998      | 0.986      | 0.988       | 0.994       |
| <b>2</b>           | 0.997      | 0.994      | 0.988       | 0.995       |
| <b>3</b>           | 0.997      | 0.995      | 0.991       | 0.995       |
| <b>4</b>           | 0.999      | 0.996      | 0.992       | 0.995       |
| <b>5</b>           | 0.999      | 0.995      | 0.992       | 0.995       |
| <b>6</b>           | 0.999      | 0.994      | 0.991       | 0.994       |
| <b>7</b>           | 1.000      | 0.994      | 0.997       | 0.997       |
| <b>8</b>           | 1.000      | 0.996      | 0.998       | 0.999       |
| <b>9</b>           | 1.000      | 0.990      | 0.997       | 0.998       |
| <b>0</b>           | 1.000      | 0.996      | 0.997       | 0.998       |
| <b>11</b>          | 0.999      | 0.990      | 0.998       | 0.999       |
| <b>12</b>          | 0.998      | 0.993      | 0.999       | 0.999       |
| <b>13</b>          | 0.999      | 0.997      | 0.997       | 0.998       |
| <b>14</b>          | 1.000      | 0.996      | 0.995       | 0.997       |
| <b>15</b>          | 1.000      | 0.995      | 0.994       | 0.996       |
| <b>16</b>          | 1.000      | 0.996      | 0.994       | 0.996       |
| <b>17</b>          | 0.999      | 0.986      | 0.993       | 0.994       |
| <b>18</b>          | 1.000      | 0.998      | 0.996       | 0.997       |
| <b>19</b>          | 1.000      | 0.997      | 0.996       | 0.998       |
| <b>20</b>          | 0.997      | 0.994      | 0.999       | 0.999       |
| <b>21</b>          | 0.996      | 0.985      | 0.999       | 0.999       |
| <b>22</b>          | 0.999      | 0.994      | 0.994       | 0.996       |
| <b>23</b>          | 0.999      | 0.992      | 0.992       | 0.993       |
| <b>24</b>          | 0.999      | 0.993      | 0.993       | 0.995       |
| <b>25</b>          | 0.999      | 0.994      | 0.999       | 0.997       |

**Fig.S1**

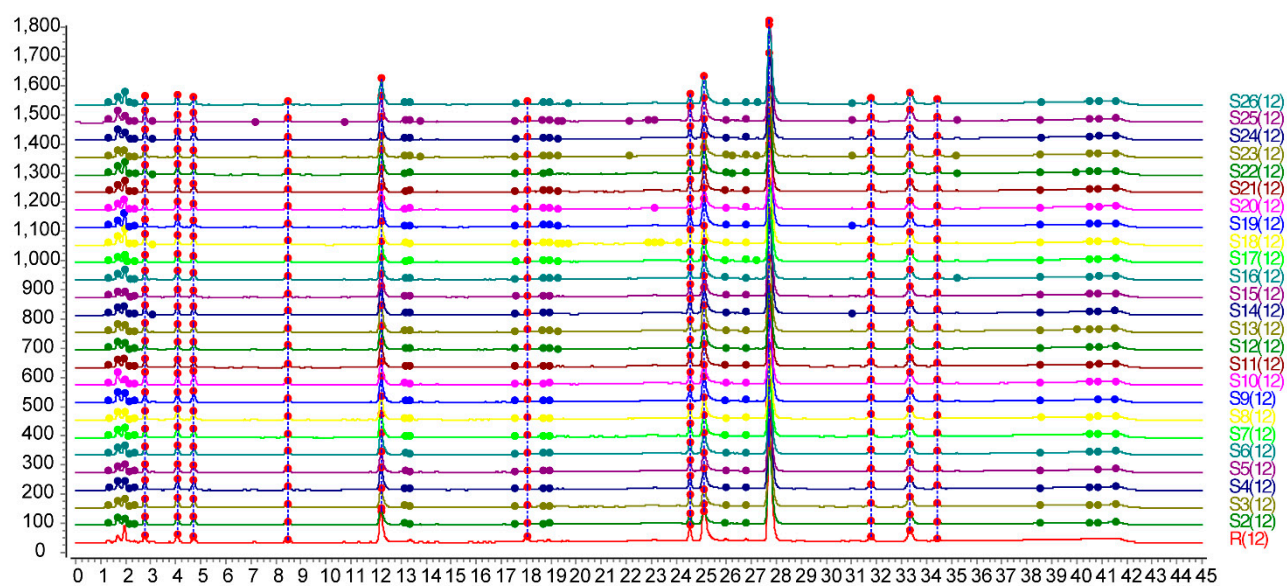

**Fig.S1 UPLC fingerprints of 25 batches of UPs after peak alignment**

**Fig.S2**

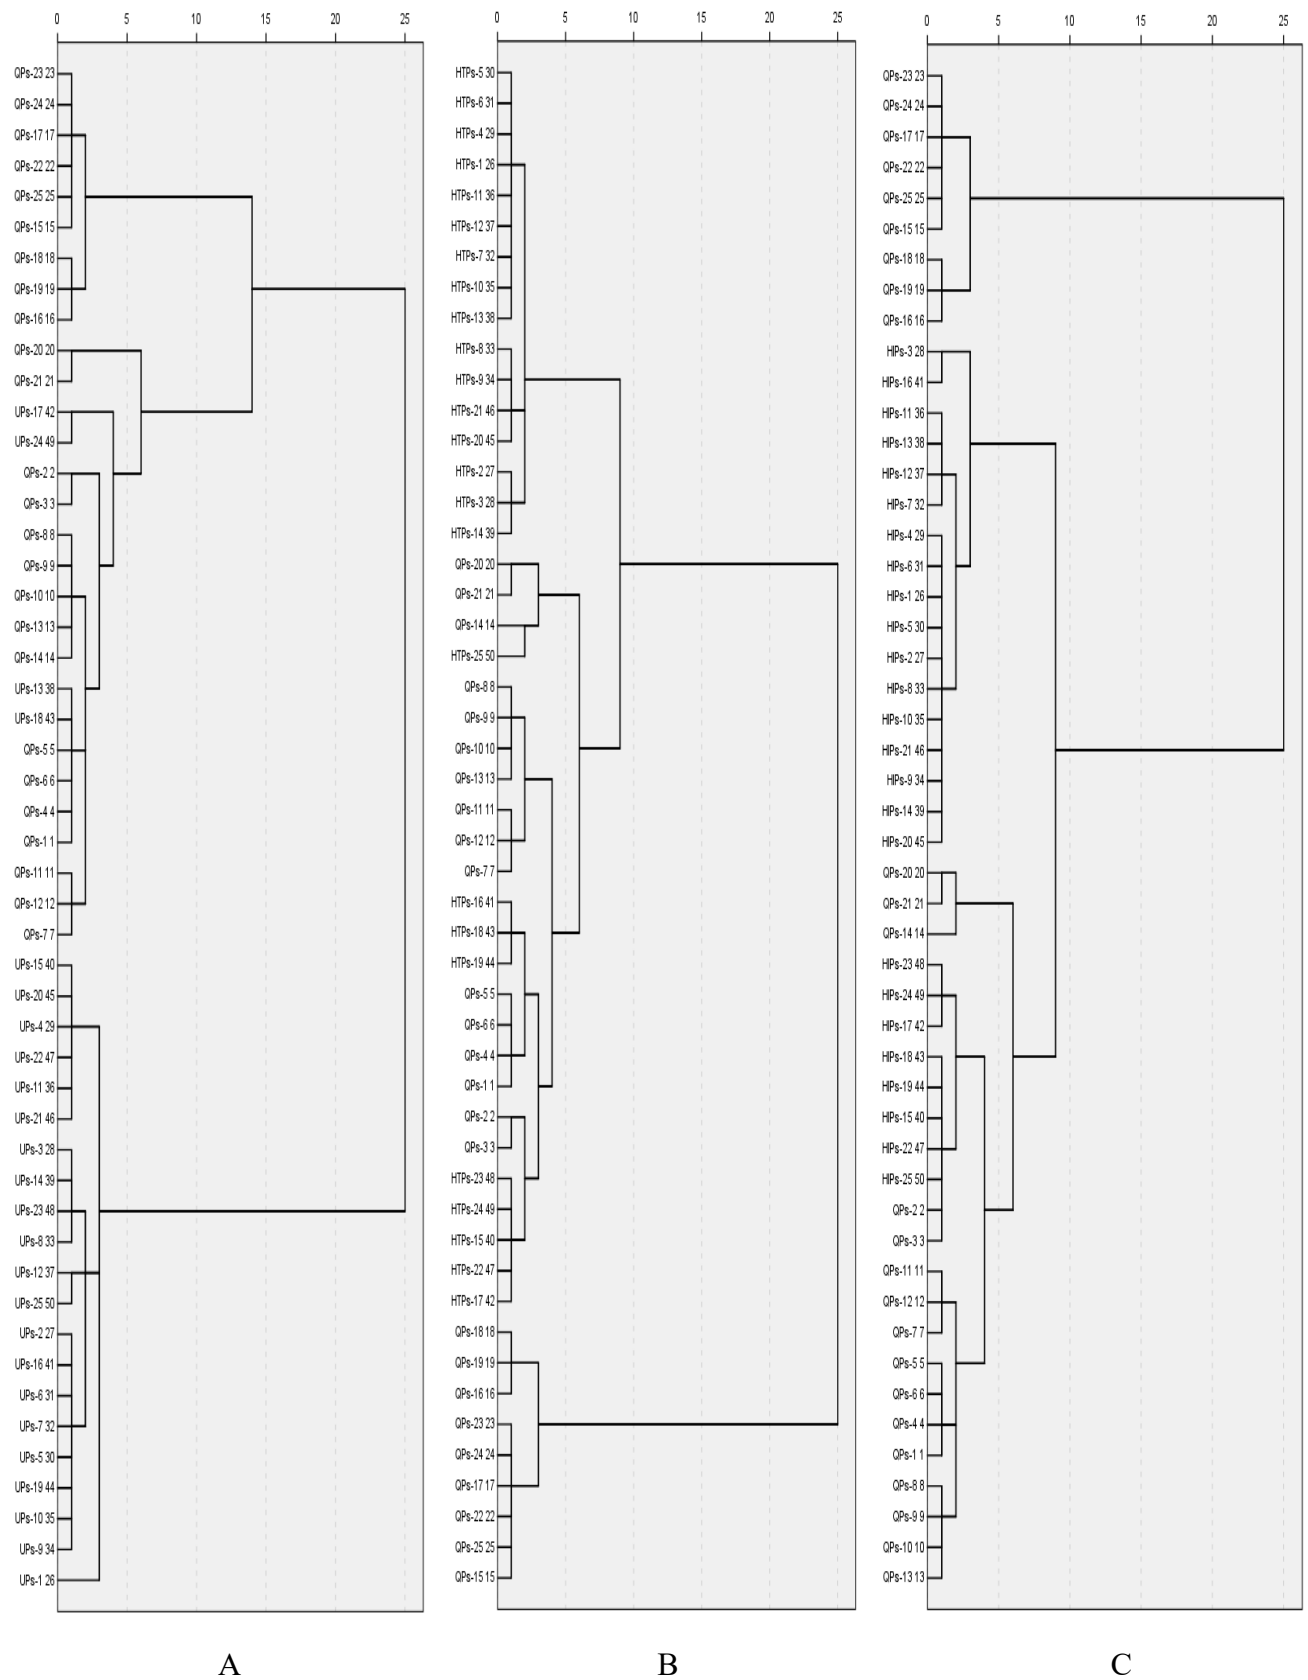

**Fig.S2 Dendrogram of the clustering of KDZ injection. (A) The QPs vs UPs group; (B) The QPs vs HTPs group; (C) The QPs vs HIPs group;**

**Fig.S3**

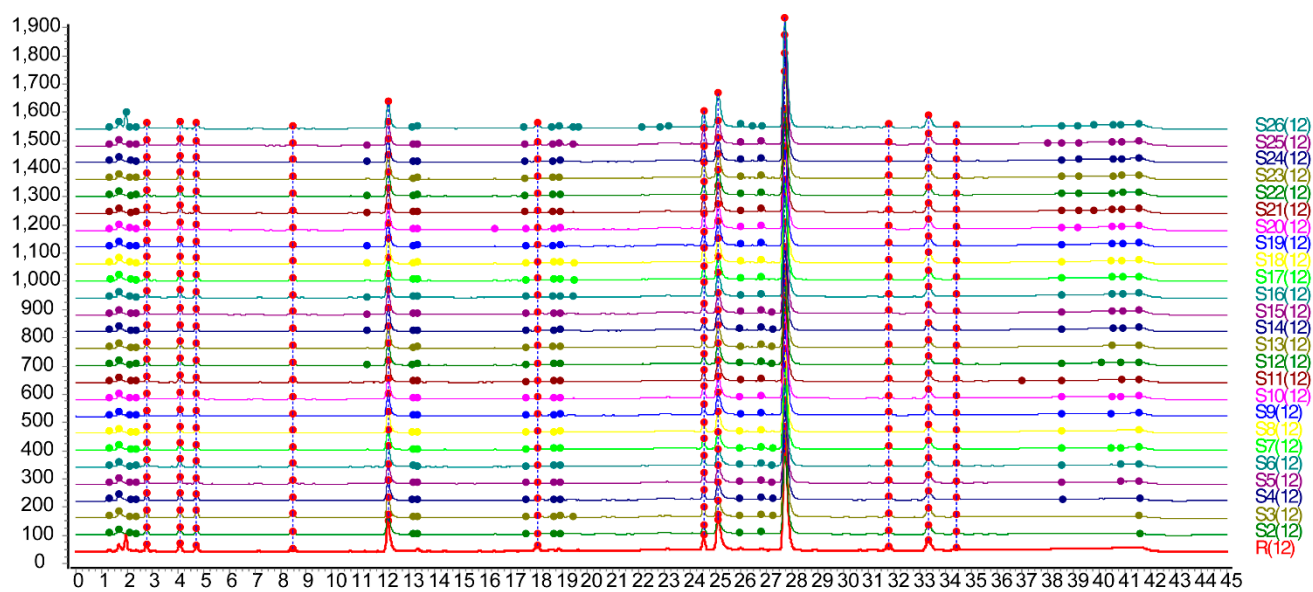

**Fig.S3 UPLC fingerprints of 25 batches of HTPs after peak alignment**

**Fig.S4**

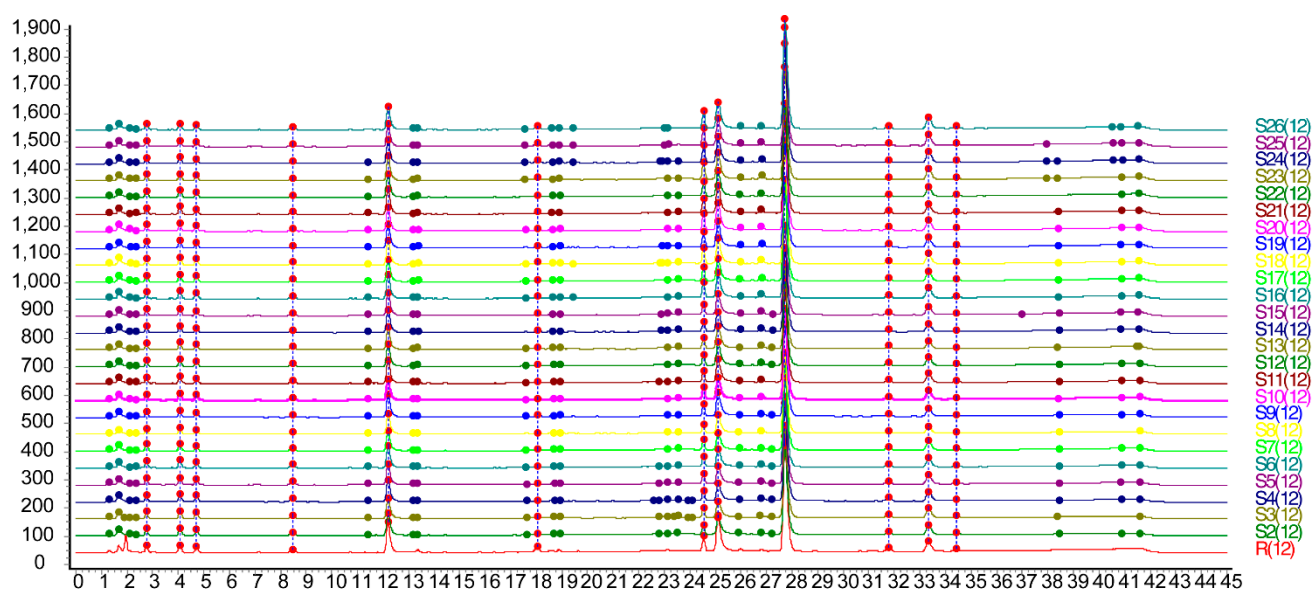

**Fig.S4 UPLC fingerprints of 25 batches of HIPs after peak alignment**
